# Supplementary material for: How central obesity influences intra-abdominal pressure: a prospective, observational study in cardiothoracic surgical patients
Source: PubMed Central journal article supplement (PMC5056912; doi:10.1186/s13613-016-0195-8), 2016-10-10

Figure S2A. Correlation between IAP and operating time

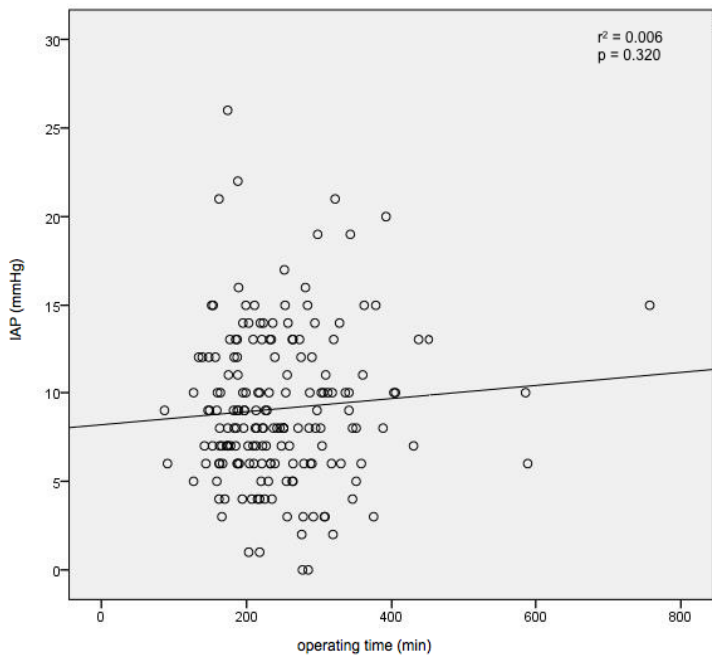

Figure S2B. Correlation between IAP and perfusion time

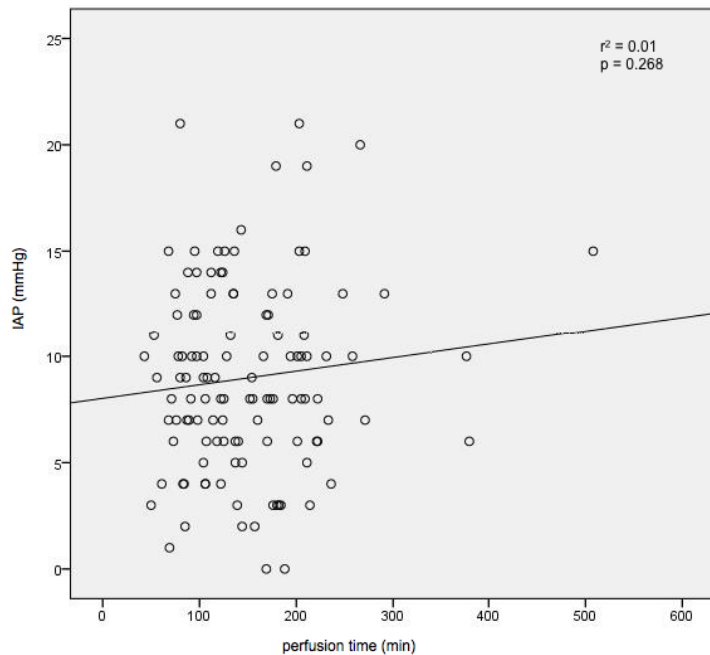

Figure S2C. Correlation between IAP and occlusion time

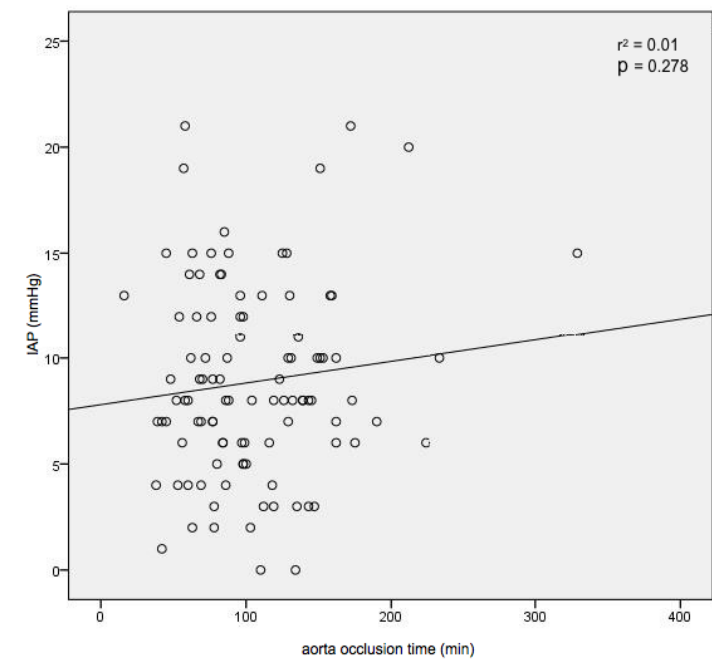

Supplement: 13613_2016_195_MOESM2_ESM.pdf [file 13613_2016_195_MOESM2_ESM.pdf]
