# Supplementary material for: How central obesity influences intra-abdominal pressure: a prospective, observational study in cardiothoracic surgical patients
Source: PubMed Central journal article supplement (PMC5056912; doi:10.1186/s13613-016-0195-8), 2016-10-10

Figure S3A. WC - Males

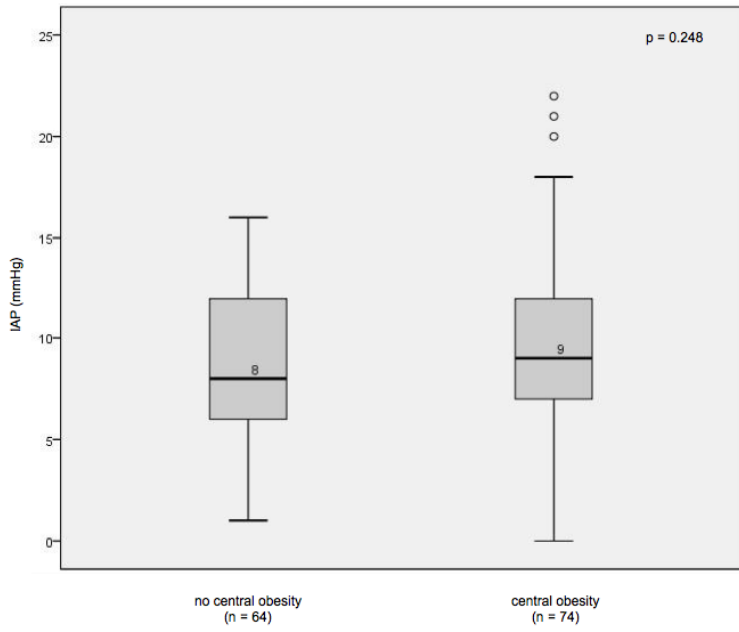

Figure S3B. WHR - Males

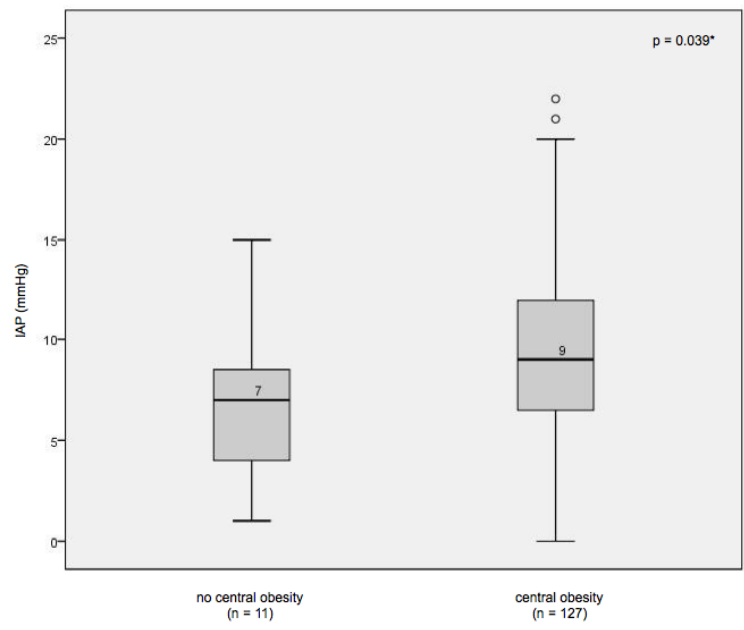

Figure S3C. WC - Females

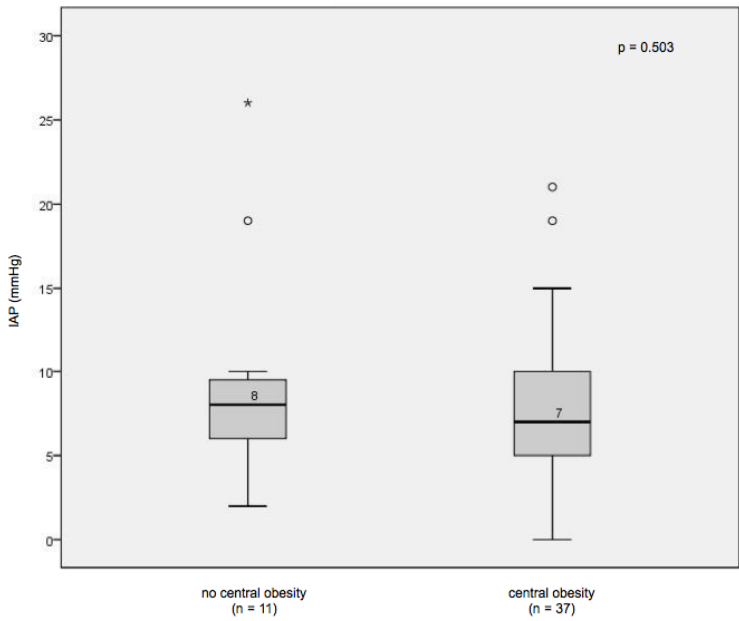

Figure S3D. WHR - Females

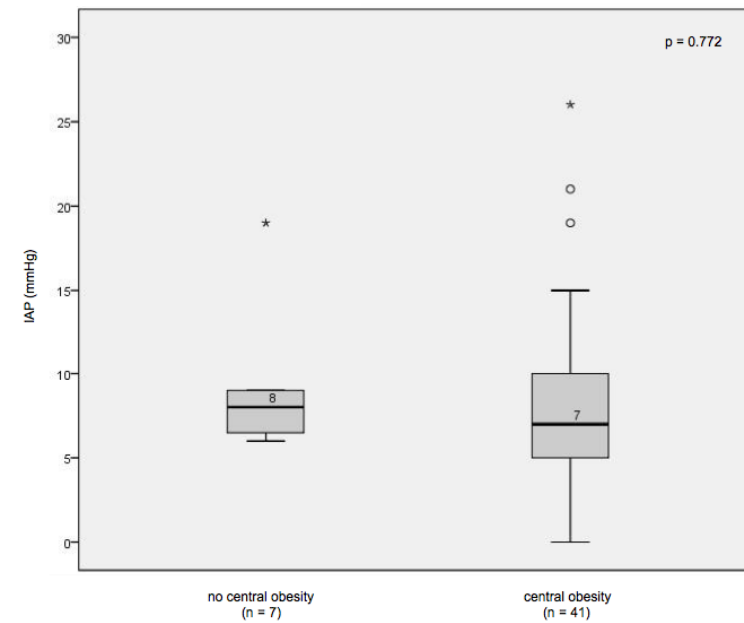

Supplement: 13613_2016_195_MOESM3_ESM.pdf [file 13613_2016_195_MOESM3_ESM.pdf]
