# Supplementary material for: How central obesity influences intra-abdominal pressure: a prospective, observational study in cardiothoracic surgical patients
Source: PubMed Central journal article supplement (PMC5056912; doi:10.1186/s13613-016-0195-8), 2016-10-10

**Figure S4. Flow chart**

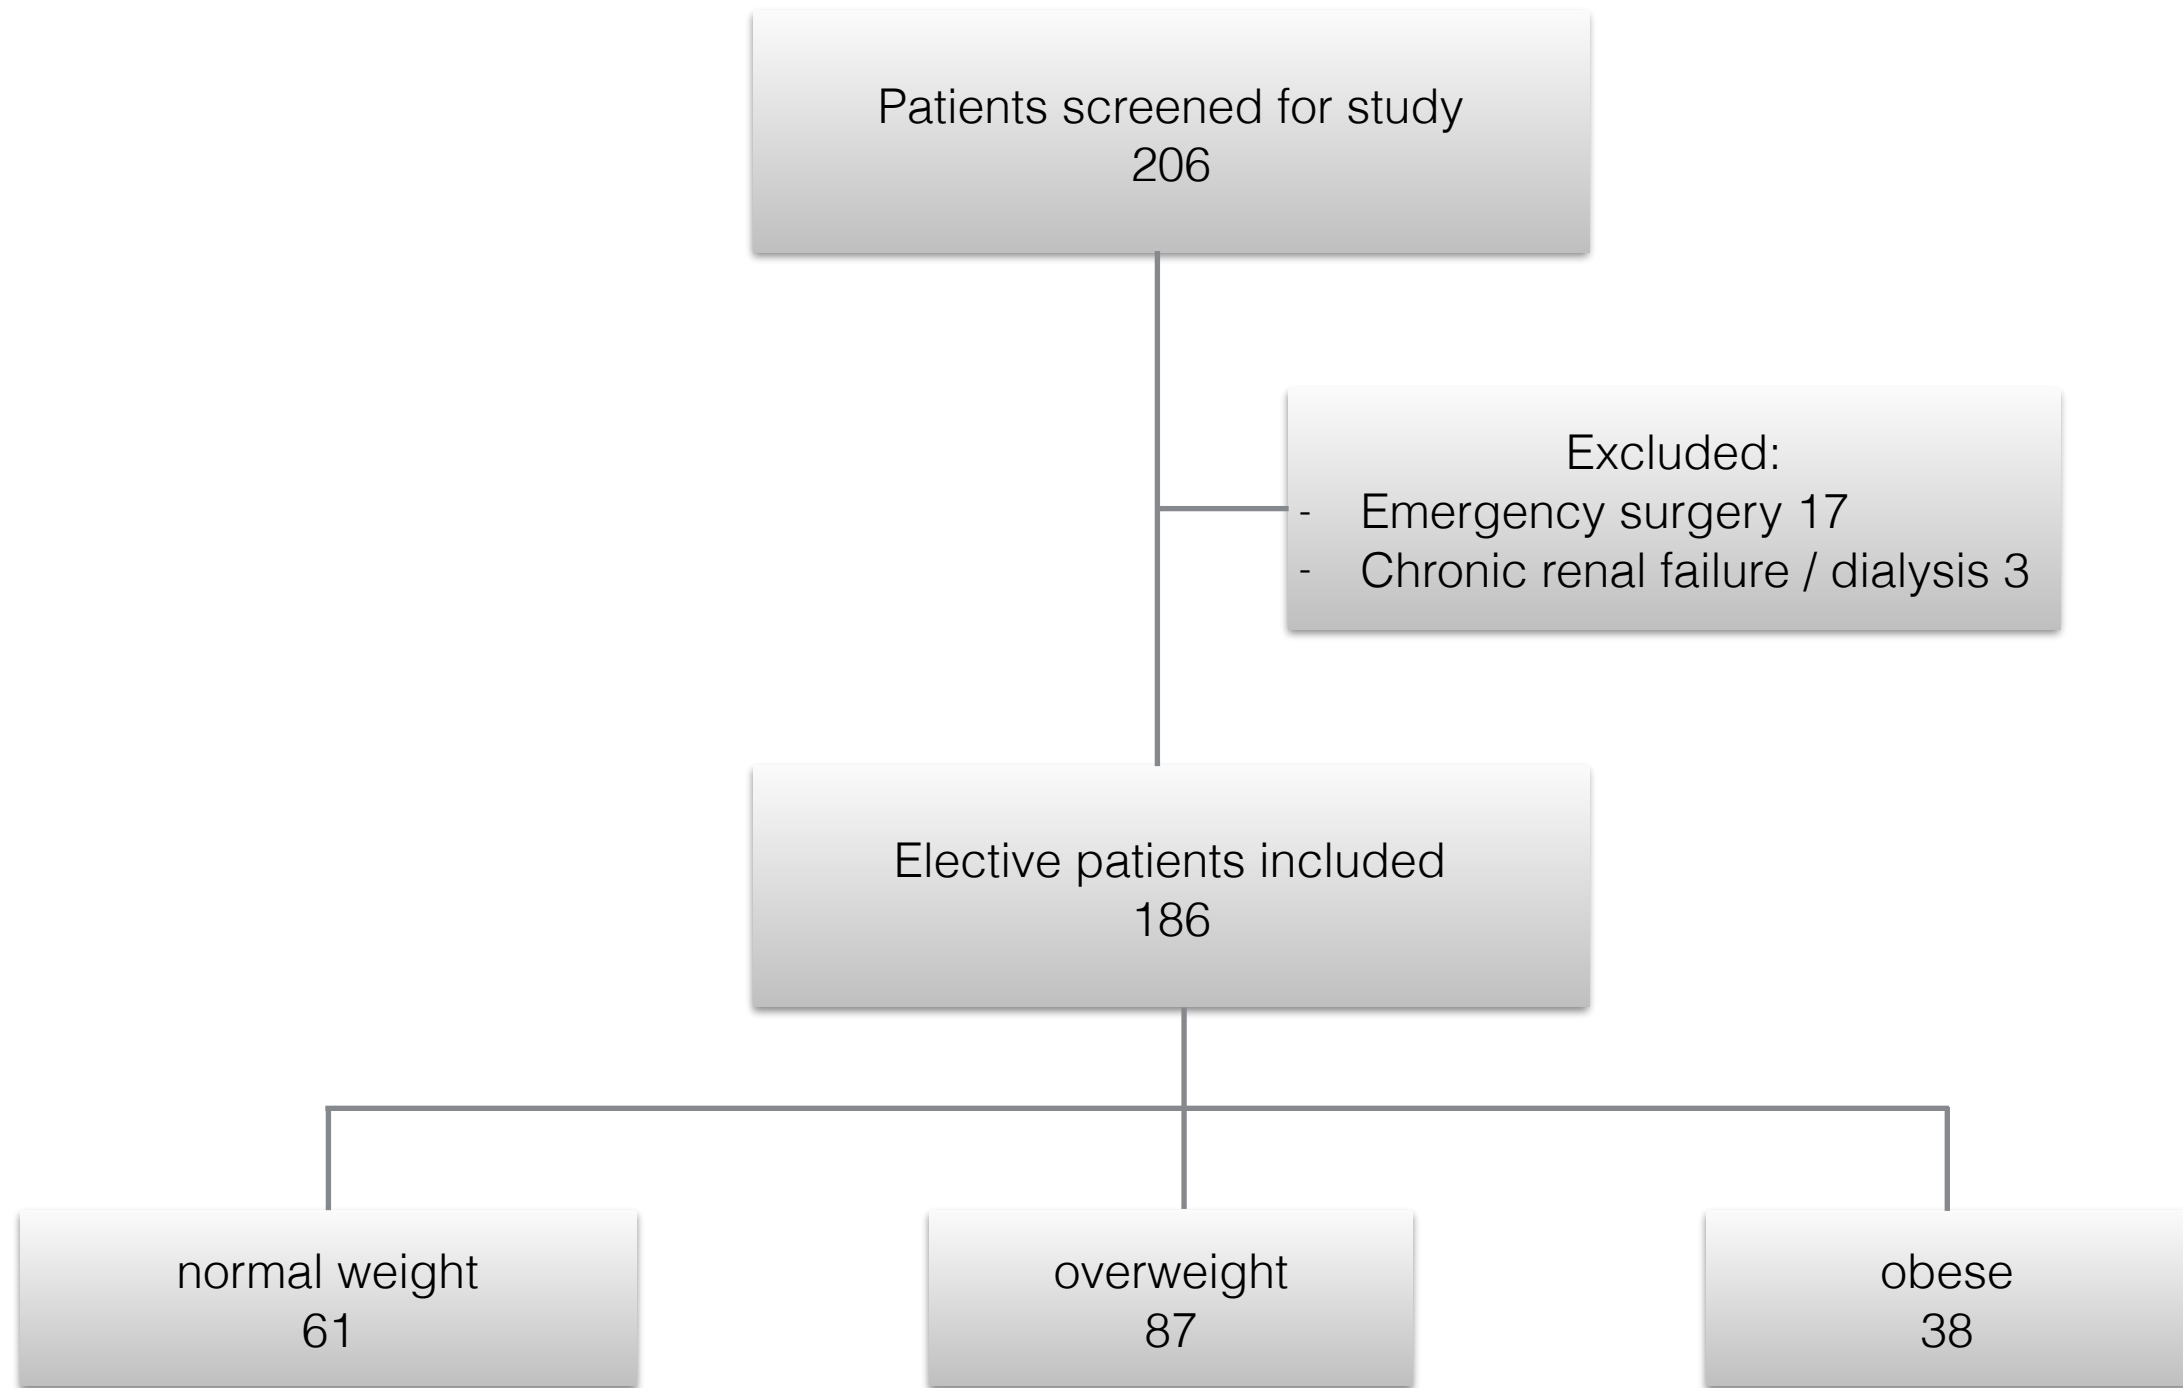

Supplement: 13613_2016_195_MOESM4_ESM.pdf [file 13613_2016_195_MOESM4_ESM.pdf]
